# Supplementary material for: Significant mass loss in the accumulation area of the Adamelloglacier indicated by the chronology of a 46 m ice core
Source: Copernicus journal article supplement (doi:10.5194/tc-2020-334), 2020-11-20
Supplement: Supplementary file 1 [file tc-2020-334-supplement.pdf]

## Supplementary Material

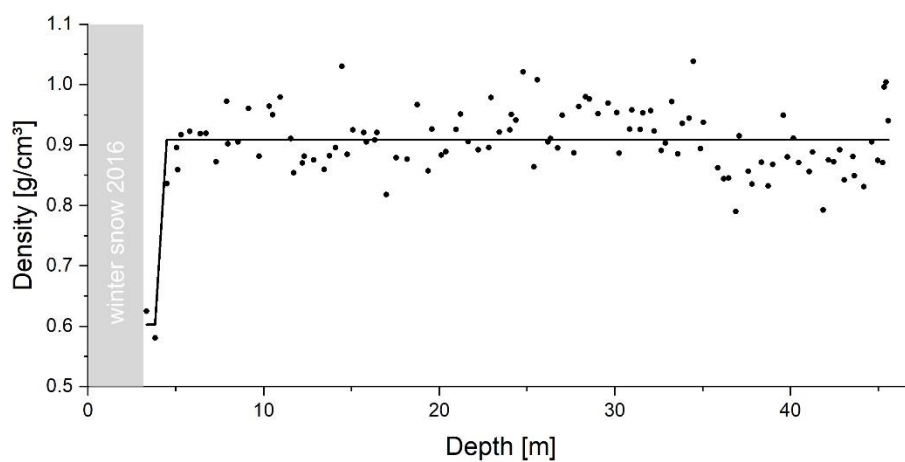

**Figure S1.** ADA 16 ice core density profile. Dots represent measured density values; the line represents mean density values.

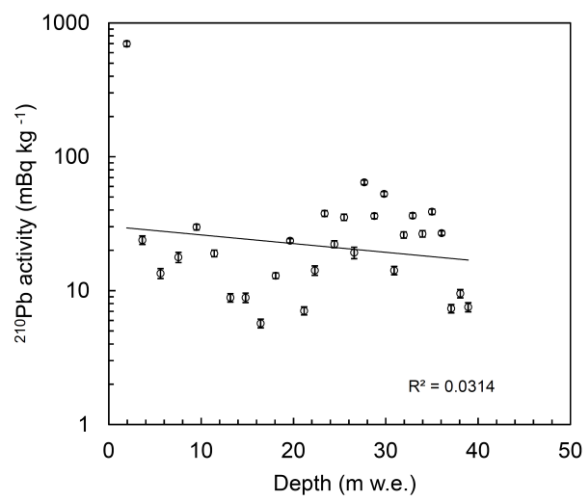

**Figure S2.** ADA16 profile of  $^{210}\text{Pb}$  activity concentrations.
